# Supplementary material for: The piranha gut microbiome provides a selective lens into river water biodiversity
Source: PubMed Central journal article supplement — Sci Rep. 2024 Sep 14;14:21518. doi: 10.1038/s41598-024-72329-8 (PMC11401890; doi:10.1038/s41598-024-72329-8), 2024-09-14
Supplement: 41598_2024_72329_MOESM2_ESM.pdf [file 41598_2024_72329_MOESM2_ESM.pdf]

Supplementary Figure 1: Fish Sampling Area, Pousada Thaimaçu, latitude 9.0530 South & 56.5763 West.

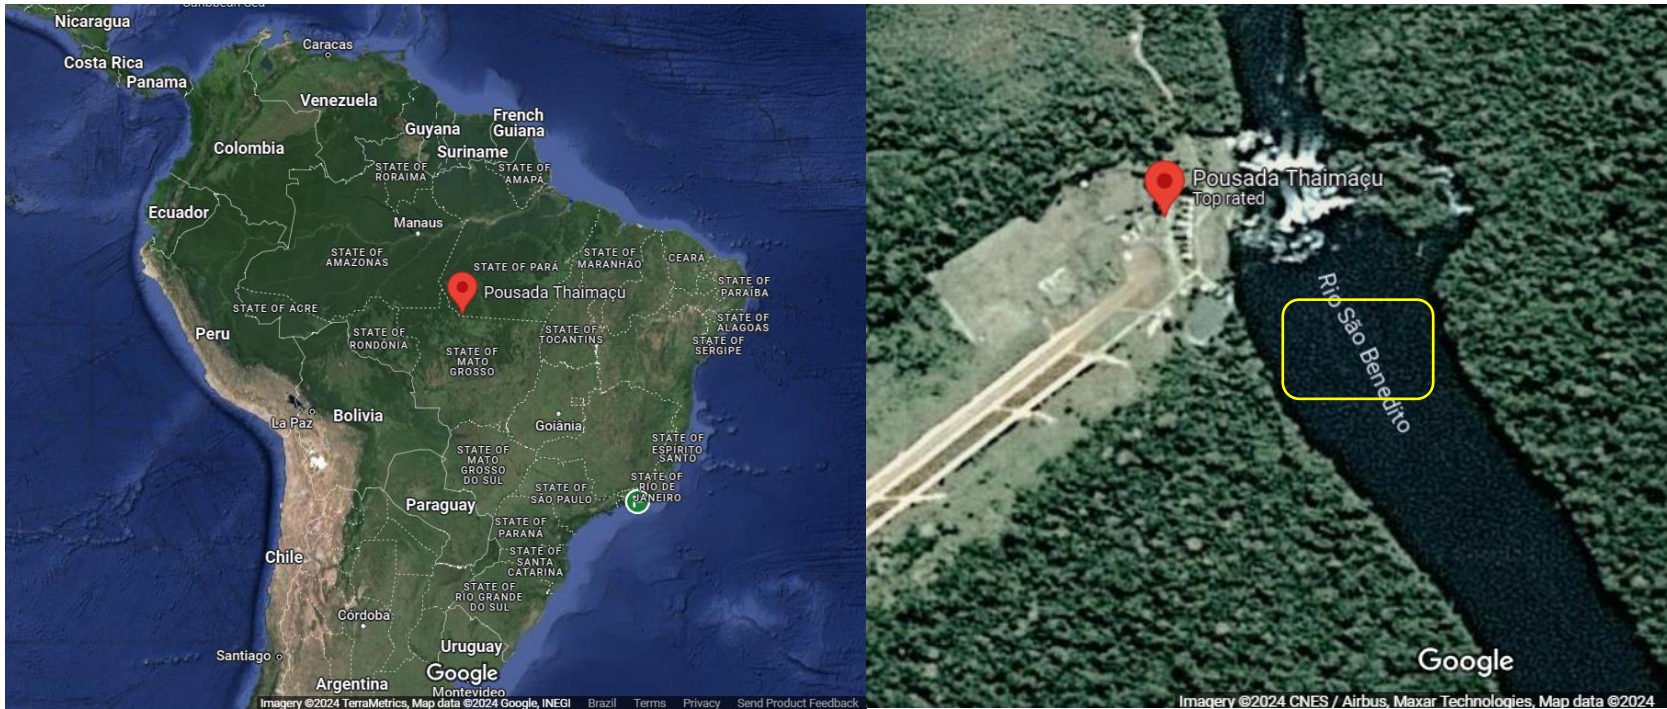

Imagery©2024 TerraMetrics, Map Data ©2024 Google, INEGI

Imagery©2024 CNES ; Airbus, Maxar Technologies, Map data ©2024

Google Maps data showing the general location of the sampling on the South of the Amazon basin on the left and the precise location on the right. The red markers show the location of the accommodation from where research was carried out. The yellow box marks the area from which the piranha were collected.
